# Supplementary material
Source: Springer Nature journal article supplement (https://www.springermedizin.de/resource/supplementary/12986_2006_80_MOESM2_ESM.pdf/25655322)

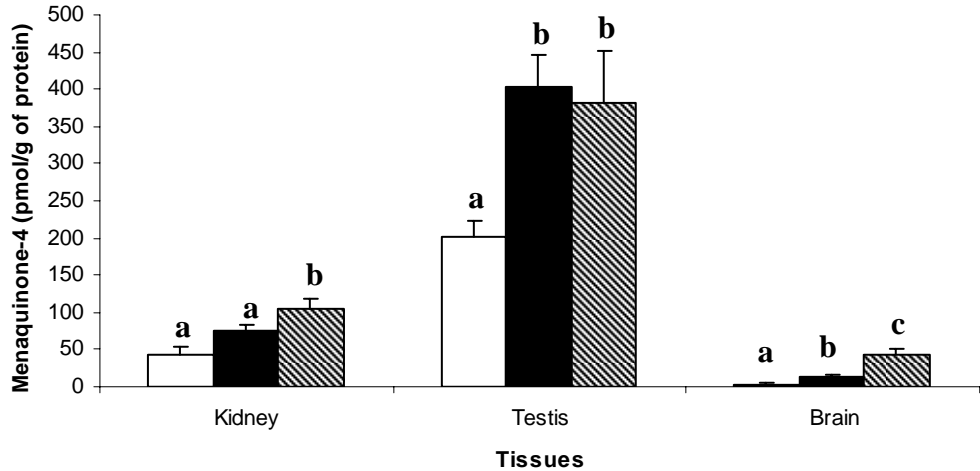

□ Vitamin E+ ■ Control ▨ Vitamin E-

Supplement: MOESM2 [file 25655322]
